# Supplementary material for: Immunological and molecular insights into acinar-ductal metaplasia and atypical flat lesions as precursor lesions of pancreatic ductal adenocarcinoma
Source: J Exp Clin Cancer Res. 2026 Jan 13;45:24. doi: 10.1186/s13046-026-03643-4 (PMC12849142; doi:10.1186/s13046-026-03643-4)
Supplement: Supplementary file 1 — Supplementary Material 1: Supplementary Table 1: Next generation sequencing panel, which includes 20 genes and 191 hotspots of the genes that are relevant for PDAC based on bioinformatics databases [file 13046_2026_3643_MOESM1_ESM.xlsx]

## Sheet: PDACmus_V1
Chr	Start	End	Gene	Transcript ID	Exon	Amplicon
chr1	65170908	65171025	Idh1	NM_010497.3	3	AMPL105877658
chr1	65171014	65171090	Idh1	NM_010497.3	3	AMPL105908302
chr2	174345123	174345253	Gnas	NM_001077510.5	7	AMPL105878124
chr2	174345236	174345324	Gnas	NM_001077510.5	7	AMPL105878125
chr2	174345372	174345475	Gnas	NM_001077510.5	8	AMPL105878152
chr2	174345439	174345536	Gnas	NM_001077510.5	8	AMPL106642134
chr3	32436384	32436503	Pik3ca	NM_008839.3	2	AMPL105877552
chr3	32436492	32436565	Pik3ca	NM_008839.3	2	AMPL105877553
chr3	32439753	32439858	Pik3ca	NM_008839.3	5	AMPL106642111
chr3	32439847	32439949	Pik3ca	NM_008839.3	5	AMPL106268279
chr3	32440584	32440667	Pik3ca	NM_008839.3	6	AMPL105744332
chr3	32440656	32440773	Pik3ca	NM_008839.3	6	AMPL105744333
chr3	32442714	32442841	Pik3ca	NM_008839.3	7	AMPL105666385
chr3	32443517	32443608	Pik3ca	NM_008839.3	8	AMPL105744347
chr3	32443592	32443698	Pik3ca	NM_008839.3	8	AMPL105744348
chr3	32443687	32443792	Pik3ca	NM_008839.3	8	AMPL105744349
chr3	32447929	32448055	Pik3ca	NM_008839.3	10	AMPL105744337
chr3	32448044	32448157	Pik3ca	NM_008839.3	10	AMPL105666402
chr3	32451791	32451916	Pik3ca	NM_008839.3	14	AMPL106642112
chr3	32461484	32461609	Pik3ca	NM_008839.3	19	AMPL106642113
chr3	32462664	32462795	Pik3ca	NM_008839.3	21	AMPL105744798
chr3	32462784	32462912	Pik3ca	NM_008839.3	21	AMPL105744799
chr3	84965296	84965424	Fbxw7	NM_080428.3	4	AMPL106642114
chr3	84970802	84970911	Fbxw7	NM_080428.3	7	AMPL105899872
chr3	84972381	84972499	Fbxw7	NM_080428.3	8	AMPL106642115
chr3	84972488	84972584	Fbxw7	NM_080428.3	8	AMPL105744527
chr3	84974396	84974520	Fbxw7	NM_080428.3	11	AMPL105744291
chr3	84976212	84976331	Fbxw7	NM_080428.3	13	AMPL106642116
chr3	103058885	103059010	Nras	NM_010937.2	2	AMPL105877554
chr3	103058999	103059085	Nras	NM_010937.2	2	AMPL105877555
chr3	103060193	103060315	Nras	NM_010937.2	3	AMPL105744650
chr3	103062354	103062477	Nras	NM_010937.2	4	AMPL105744652
chr3	103062466	103062538	Nras	NM_010937.2	4	AMPL106287375
chr4	89276642	89276774	Cdkn2a	NM_001040654.1	2	AMPL106614274
chr4	89276793	89276929	Cdkn2a	NM_001040654.1	2	AMPL105684739
chr4	89276929	89277036	Cdkn2a	NM_001040654.1	2	AMPL105744510
chr4	89281984	89282115	Cdkn2a	NM_001040654.1	1	AMPL106614273
chr4	133680423	133680556	Arid1a	NM_001080819.2	20	AMPL106287403
chr4	133680545	133680666	Arid1a	NM_001080819.2	20	AMPL106287404
chr4	133680599	133680701	Arid1a	NM_001080819.2	20	AMPL105745128
chr4	133680799	133680921	Arid1a	NM_001080819.2	20	AMPL106628810
chr4	133680914	133681046	Arid1a	NM_001080819.2	20	AMPL105745131
chr4	133681033	133681129	Arid1a	NM_001080819.2	20	AMPL105745132
chr4	133681117	133681209	Arid1a	NM_001080819.2	20	AMPL106631979
chr4	133681198	133681311	Arid1a	NM_001080819.2	20	AMPL106868773
chr4	133681479	133681609	Arid1a	NM_001080819.2	20	AMPL105745138
chr4	133681603	133681700	Arid1a	NM_001080819.2	20	AMPL106868772
chr4	133681957	133682081	Arid1a	NM_001080819.2	20	AMPL106868771
chr4	133685142	133685274	Arid1a	NM_001080819.2	18	AMPL105744443
chr4	133685274	133685393	Arid1a	NM_001080819.2	18	AMPL105744444
chr4	133686368	133686488	Arid1a	NM_001080819.2	16	AMPL106032721
chr4	133686473	133686579	Arid1a	NM_001080819.2	16	AMPL106032722
chr4	133686606	133686724	Arid1a	NM_001080819.2	15	AMPL105744450
chr4	133686676	133686796	Arid1a	NM_001080819.2	15	AMPL105744451
chr4	133689047	133689168	Arid1a	NM_001080819.2	12	AMPL105744454
chr4	133689158	133689263	Arid1a	NM_001080819.2	12	AMPL106878643
chr4	133690982	133691110	Arid1a	NM_001080819.2	11	AMPL105744485
chr4	133691099	133691222	Arid1a	NM_001080819.2	11	AMPL105744486
chr4	133691157	133691248	Arid1a	NM_001080819.2	11	AMPL105744487
chr6	39627707	39627789	Braf	NM_139294.5	18	AMPL105877418
chr6	39627763	39627872	Braf	NM_139294.5	18	AMPL105684635
chr6	39643095	39643218	Braf	NM_139294.5	14	AMPL106268810
chr6	145232087	145232213	Kras	NM_021284.6	4	AMPL106642125
chr6	145234238	145234354	Kras	NM_021284.6	3	AMPL105720009
chr6	145234343	145234427	Kras	NM_021284.6	3	AMPL105744141
chr6	145246587	145246705	Kras	NM_021284.6	2	AMPL105720016
chr6	145246696	145246799	Kras	NM_021284.6	2	AMPL105695495
chr6	145246794	145246883	Kras	NM_021284.6	2	AMPL105720017
chr7	80098948	80099059	Idh2	NM_173011.2	4	AMPL105877632
chr7	80099030	80099136	Idh2	NM_173011.2	4	AMPL106642126
chr7	130180346	130180444	Fgfr2	NM_201601.2	10	AMPL105744404
chr7	130180433	130180512	Fgfr2	NM_201601.2	10	AMPL105744405
chr7	130196262	130196349	Fgfr2	NM_201601.2	7	AMPL105746417
chr7	130196336	130196414	Fgfr2	NM_201601.2	7	AMPL105746418
chr7	130200975	130201072	Fgfr2	NM_201601.2	5	AMPL105744398
chr7	130201054	130201171	Fgfr2	NM_201601.2	5	AMPL105684710
chr9	120950534	120950658	Ctnnb1	NM_007614.3	3	AMPL105898973
chr10	80116720	80116845	Stk11	NM_011492.5	1	AMPL106642131
chr10	80116770	80116895	Stk11	NM_011492.5	1	AMPL105744737
chr10	80125918	80126047	Stk11	NM_011492.5	4	AMPL105744528
chr10	80126036	80126138	Stk11	NM_011492.5	4	AMPL105744529
chr10	80126128	80126242	Stk11	NM_011492.5	4	AMPL105744530
chr10	80126258	80126381	Stk11	NM_011492.5	5	AMPL106642132
chr10	80126645	80126727	Stk11	NM_011492.5	6	AMPL105744531
chr10	80126716	80126785	Stk11	NM_011492.5	6	AMPL106268406
chr10	80127883	80127981	Stk11	NM_011492.5	8	AMPL105744537
chr10	80127970	80128066	Stk11	NM_011492.5	8	AMPL106642133
chr11	16860053	16860182	Egfr	NM_007912.4	3	AMPL106642122
chr11	16869259	16869383	Egfr	NM_207655.2	7	AMPL105899914
chr11	16883441	16883555	Egfr	NM_207655.2	15	AMPL106642123
chr11	16891161	16891283	Egfr	NM_207655.2	18	AMPL105721981
chr11	16891274	16891393	Egfr	NM_207655.2	18	AMPL105685406
chr11	16893003	16893120	Egfr	NM_207655.2	19	AMPL105898981
chr11	16896831	16896947	Egfr	NM_207655.2	20	AMPL105721939
chr11	16896935	16897044	Egfr	NM_207655.2	20	AMPL105721940
chr11	16897033	16897107	Egfr	NM_207655.2	20	AMPL105721941
chr11	16904259	16904383	Egfr	NM_207655.2	21	AMPL105721960
chr11	16904372	16904460	Egfr	NM_207655.2	21	AMPL106268439
chr11	69586903	69587028	Trp53	NM_011640.3	2	AMPL106642127
chr11	69587445	69587570	Trp53	NM_011640.3	4	AMPL105720014
chr11	69587559	69587646	Trp53	NM_011640.3	4	AMPL106571999
chr11	69588364	69588469	Trp53	NM_011640.3	5	AMPL105694172
chr11	69588497	69588601	Trp53	NM_011640.3	5	AMPL105662288
chr11	69588619	69588744	Trp53	NM_011640.3	6	AMPL105662283
chr11	69589563	69589663	Trp53	NM_011640.3	8	AMPL105720012
chr11	69589658	69589756	Trp53	NM_011640.3	8	AMPL105720013
chr11	69589778	69589888	Trp53	NM_011640.3	9	AMPL105662284
chr11	69590654	69590784	Trp53	NM_011640.3	10	AMPL105666519
chr11	87664599	87664724	Rnf43	NM_172448.4	2	AMPL106138787
chr11	87664619	87664745	Rnf43	NM_172448.4	2	AMPL106138788
chr11	87664823	87664903	Rnf43	NM_172448.4	2	AMPL106138790
chr11	87718364	87718493	Rnf43	NM_172448.4	3	AMPL106138717
chr11	87718451	87718559	Rnf43	NM_172448.4	3	AMPL106242453
chr11	87727068	87727194	Rnf43	NM_172448.4	4	AMPL106242463
chr11	87727190	87727275	Rnf43	NM_172448.4	4	AMPL106242464
chr11	87727300	87727425	Rnf43	NM_172448.4	5	AMPL106242469
chr11	87727414	87727503	Rnf43	NM_172448.4	5	AMPL106242470
chr11	87727950	87728063	Rnf43	NM_172448.4	6	AMPL106242473
chr11	87728045	87728145	Rnf43	NM_172448.4	6	AMPL106242474
chr11	87729370	87729500	Rnf43	NM_172448.4	7	AMPL106642106
chr11	87729416	87729533	Rnf43	NM_172448.4	7	AMPL106642107
chr11	87729540	87729618	Rnf43	NM_172448.4	7	AMPL106242462
chr11	87730100	87730187	Rnf43	NM_172448.4	8	AMPL106242458
chr11	87730176	87730260	Rnf43	NM_172448.4	8	AMPL106204690
chr11	87730950	87731081	Rnf43	NM_172448.4	9	AMPL106242465
chr11	87731073	87731183	Rnf43	NM_172448.4	9	AMPL106138759
chr11	87731172	87731269	Rnf43	NM_172448.4	9	AMPL106138760
chr11	87731303	87731426	Rnf43	NM_172448.4	9	AMPL105961040
chr11	87731425	87731512	Rnf43	NM_172448.4	9	AMPL106138762
chr11	87731504	87731630	Rnf43	NM_172448.4	9	AMPL106138763
chr11	87731617	87731701	Rnf43	NM_172448.4	9	AMPL106138764
chr11	87731769	87731887	Rnf43	NM_172448.4	9	AMPL106138766
chr11	87731878	87732007	Rnf43	NM_172448.4	9	AMPL106138767
chr11	87732003	87732089	Rnf43	NM_172448.4	9	AMPL106108204
chr11	87732151	87732239	Rnf43	NM_172448.4	9	AMPL106138769
chr11	87732219	87732339	Rnf43	NM_172448.4	9	AMPL106138770
chr11	87732328	87732408	Rnf43	NM_172448.4	9	AMPL106138771
chr11	87734108	87734206	Rnf43	NM_172448.4	10	AMPL105904245
chr17	71885252	71885371	Alk	NM_007439.2	25	AMPL105744954
chr17	71885360	71885448	Alk	NM_007439.2	25	AMPL106110989
chr17	71890950	71891059	Alk	NM_007439.2	24	AMPL106642109
chr17	71894109	71894219	Alk	NM_007439.2	23	AMPL106642110
chr18	34312634	34312760	Apc	NM_007462.3	16	AMPL106642117
chr18	34313308	34313429	Apc	NM_007462.3	16	AMPL106642118
chr18	34313784	34313912	Apc	NM_007462.3	16	AMPL106642119
chr18	34313901	34314027	Apc	NM_007462.3	16	AMPL105721690
chr18	34314016	34314123	Apc	NM_007462.3	16	AMPL105721691
chr18	34314112	34314225	Apc	NM_007462.3	16	AMPL105721692
chr18	34314214	34314311	Apc	NM_007462.3	16	AMPL105721693
chr18	34314299	34314429	Apc	NM_007462.3	16	AMPL105685435
chr18	34314418	34314524	Apc	NM_007462.3	16	AMPL105721694
chr18	34314513	34314606	Apc	NM_007462.3	16	AMPL105721695
chr18	34314595	34314693	Apc	NM_007462.3	16	AMPL106642120
chr18	34314682	34314801	Apc	NM_007462.3	16	AMPL106642121
chr18	73640267	73640394	Smad4	NM_008540.3	12	AMPL105685086
chr18	73640348	73640461	Smad4	NM_007462.3	12	AMPL106140179
chr18	73641791	73641882	Smad4	NM_007462.3	11	AMPL105878556
chr18	73641815	73641926	Smad4	NM_007462.3	11	AMPL106642128
chr18	73648811	73648938	Smad4	NM_007462.3	10	AMPL105724793
chr18	73648920	73649032	Smad4	NM_007462.3	10	AMPL105724794
chr18	73649021	73649099	Smad4	NM_007462.3	10	AMPL105724795
chr18	73649651	73649748	Smad4	NM_007462.3	9	AMPL106268621
chr18	73649737	73649837	Smad4	NM_007462.3	9	AMPL106268622
chr18	73649826	73649909	Smad4	NM_007462.3	9	AMPL106268623
chr18	73657132	73657229	Smad4	NM_007462.3	8	AMPL105724786
chr18	73657218	73657331	Smad4	NM_007462.3	8	AMPL105724787
chr18	73658539	73658656	Smad4	NM_007462.3	7	AMPL105724778
chr18	73658645	73658764	Smad4	NM_007462.3	7	AMPL105724779
chr18	73658795	73658898	Smad4	NM_007462.3	6	AMPL106268624
chr18	73662677	73662808	Smad4	NM_007462.3	5	AMPL105724781
chr18	73662797	73662887	Smad4	NM_007462.3	5	AMPL105724782
chr18	73675051	73675169	Smad4	NM_007462.3	4	AMPL105684784
chr18	73675167	73675257	Smad4	NM_007462.3	4	AMPL105724774
chr18	73675678	73675796	Smad4	NM_007462.3	3	AMPL106642130
chr18	73675785	73675907	Smad4	NM_007462.3	3	AMPL105900141
chr19	32775987	32776082	Pten	NM_008960.2	2	AMPL105877436
chr19	32776071	32776153	Pten	NM_008960.2	2	AMPL105744428
chr19	32792478	32792551	Pten	NM_008960.2	3	AMPL105744435
chr19	32792565	32792674	Pten	NM_008960.2	3	AMPL105666217
chr19	32799859	32799930	Pten	NM_008960.2	5	AMPL105744432
chr19	32799919	32800033	Pten	NM_008960.2	5	AMPL105744433
chr19	32800022	32800100	Pten	NM_008960.2	5	AMPL106642124
chr19	32811669	32811784	Pten	NM_008960.2	6	AMPL105744429
chr19	32811773	32811863	Pten	NM_008960.2	6	AMPL106622130
chr19	32815395	32815485	Pten	NM_008960.2	7	AMPL105744425
chr19	32815472	32815550	Pten	NM_008960.2	7	AMPL105744426
chr19	32815539	32815616	Pten	NM_008960.2	7	AMPL105744427
chr19	32817743	32817869	Pten	NM_008960.2	8	AMPL105744421
chr19	32817858	32817925	Pten	NM_008960.2	8	AMPL105744422
chr19	32817914	32817997	Pten	NM_008960.2	8	AMPL105744423
chr19	32817986	32818088	Pten	NM_008960.2	8	AMPL105744424
