# Supplementary material for: Immunological and molecular insights into acinar-ductal metaplasia and atypical flat lesions as precursor lesions of pancreatic ductal adenocarcinoma
Source: J Exp Clin Cancer Res. 2026 Jan 13;45:24. doi: 10.1186/s13046-026-03643-4 (PMC12849142; doi:10.1186/s13046-026-03643-4)
Supplement: Supplementary file 4 — Supplementary Material 4: Supplementary Table 5: Details of the copy number variation analysis in AFL and PanIN (47). AFL: Atypical flat lesion, PanIN: Pancreatic intraepithelial neoplasia, CNA: Copy number alteration. The PanIN section was reproduced based on the original publication data under the Creative Commons Attribution 4.0 (CC BY 4.0) license. The original data was used for table creation. © Author(s) (or their employer(s)) 2023. Re-use permitted under CC BY 4.0. License link: https://creativecommons.org/licenses/by/4.0/ [file 13046_2026_3643_MOESM4_ESM.xlsx]

## Sheet: 20250721_new_supplementary_tabl
sample	gene	hgvsp	impact	consequence	chromosome	position	reference allele	alternative allele	exon	probability [%] somatic_ADM	ADM allele fraction	ADM read depth	probability [%] somatic_AFL	AFL allele fraction	AFL read depth	probability [%] somatic_PanIN	PanIN allele fraction	PanIN read depth	probability [%] germline	probability [%] somatic_normal	normal allele fraction	normal read depth	probability [%] somatic_any_lesion	probability [%] artifact	probability [%] absent	ensembl_gene_id	ensembl_transcript_id	ensembl_protein_id	hgvsg	hgvsc
24	Alk	p.Ala1278Val	MODERATE	missense_variant	17	72192365	G	A	number / total: 25 / 29	995965778827667	107524998486042	184	7.35697e-16	0	197	7.81989e-16	0	184	0	1.43635e+09	0	196	403403770178556	0	3.75146e-13	ENSMUSG00000055471	ENSMUST00000086639	ENSMUSP00000083840.5	17:g.72192365G>A	c.3833C>T
24	Apc	p.Ala1365Val	MODERATE	missense_variant	18	34447199	C	T	number / total: 16 / 16	7.65421e-08	0	201	7.09741e-08	0	218	996315181255341	10717000067234	199	0	1.33746e+09	0	190	368451164104044	1.91078e+09	3.99301e-05	ENSMUSG00000005871	ENSMUST00000079362	ENSMUSP00000078337.6	18:g.34447199C>T	c.4094C>T
13	Apc	p.Ala868Glu	MODERATE	missense_variant	18	34445708	C	A	number / total: 16 / 16	996088922023773	545771010220051	217	17.1238	0	201	1.77215	0	196	0	5.14197e+07	0	192	391101883724332	4.47682e+08	8883.83	ENSMUSG00000005871	ENSMUST00000079362	ENSMUSP00000078337.6	18:g.34445708C>A	c.2603C>A
25	Apc	p.Arg1112Ter	HIGH	stop_gained	18	34446439	C	T	number / total: 16 / 16	1.0556e-10	0	186	9.69841e-11	0	204	996055245399475	673077031970024	195	0	2.89461e+08	0	191	394475413486362	0	5.11917e-08	ENSMUSG00000005871	ENSMUST00000079362	ENSMUSP00000078337.6	18:g.34446439C>T	c.3334C>T
13	Apc	p.Arg1449Gly	MODERATE	missense_variant	18	34447450	A	G	number / total: 16 / 16	989802300930023	107192002236843	198	1.4013e-29	0	198	0	0	201	0	492833	0	199	101976450532675	1.44544e-05	8.96831e-28	ENSMUSG00000005871	ENSMUST00000079362	ENSMUSP00000078337.6	18:g.34447450A>G	c.4345A>G
24	Apc	p.Asp1485Asn	MODERATE	missense_variant	18	34447558	G	A	number / total: 16 / 16	652249872684479	651545971632004	192	0.00282683	0	192	1.05293e-05	0	195	0	128283249978267	0	192	347749084234238	4.38601e+06	0.00533212	ENSMUSG00000005871	ENSMUST00000079362	ENSMUSP00000078337.6	18:g.34447558G>A	c.4453G>A
13	Apc	p.Asp1568Gly	MODERATE	missense_variant	18	34447808	A	G	number / total: 16 / 16	989959895610809	648476034402847	204	0.69183	0	204	0.171238	0	192	0	4.46498e+08	0	193	100401472300291	1.06287e+08	85.2315	ENSMUSG00000005871	ENSMUST00000079362	ENSMUSP00000078337.6	18:g.34447808A>G	c.4703A>G
13	Apc	p.Gln1301Ter	HIGH	stop_gained	18	34447006	C	T	number / total: 16 / 16	996181547641754	107127003371716	201	2.58762e-12	0	199	2.52988e-12	0	204	0	1.42633e+09	0	200	381830031983554	0	1.33629e-09	ENSMUSG00000005871	ENSMUST00000079362	ENSMUSP00000078337.6	18:g.34447006C>T	c.3901C>T
24	Apc	p.Glu1284Lys	MODERATE	missense_variant	18	34446955	G	A	number / total: 16 / 16	996022284030914	653107985854149	186	0.000807421	0	192	8.05936e-05	0	193	0	2.78202e+08	0	190	397722376510501	4.4725e+09	0.404389	ENSMUSG00000005871	ENSMUST00000079362	ENSMUSP00000078337.6	18:g.34446955G>A	c.3850G>A
13	Apc	p.Leu1481Phe	MODERATE	missense_variant	18	34447546	C	T	number / total: 16 / 16	996178030967712	548922009766102	203	9.09494e-06	0	205	9.31108e-06	0	201	0	1.10532e+08	0	189	382164213806391	2.76312e+08	0.00480286	ENSMUSG00000005871	ENSMUST00000079362	ENSMUSP00000078337.6	18:g.34447546C>T	c.4441C>T
24	Apc	p.Met1430Ile	MODERATE	missense_variant	18	34447395	G	A	number / total: 16 / 16	6.4402e-24	0	207	6.6819e-24	0	199	996209323406219	126827001571655	215	0	782888	0	201	379061768762767	117652	3.45224e-21	ENSMUSG00000005871	ENSMUST00000079362	ENSMUSP00000078337.6	18:g.34447395G>A	c.4290G>A
24	Apc	p.Pro1408Ser	MODERATE	missense_variant	18	34447327	C	T	number / total: 16 / 16	8889.96	0	194	8697.61	0	199	983335375785828	548922009766102	202	0	175392160599586	0	193	16609251499176	378756412828807	104568	ENSMUSG00000005871	ENSMUST00000079362	ENSMUSP00000078337.6	18:g.34447327C>T	c.4222C>T
13	Apc	p.Pro1440Ser	MODERATE	missense_variant	18	34447423	C	T	number / total: 16 / 16	996131241321564	650558024644852	196	3.1864e-08	0	197	3.15137e-08	0	201	0	2.68547e+08	0	199	386874401010573	0	1.63343e-05	ENSMUSG00000005871	ENSMUST00000079362	ENSMUSP00000078337.6	18:g.34447423C>T	c.4318C>T
24	Apc	p.Thr1265Ile	MODERATE	missense_variant	18	34446899	C	T	number / total: 16 / 16	996094524860382	55104698985815	194	0.0171238	0	198	0.0170687	0	199	0	9.34588e+07	0	192	387364742346108	317906851705629	8.80037	ENSMUSG00000005871	ENSMUST00000079362	ENSMUSP00000078337.6	18:g.34446899C>T	c.3794C>T
24	Arid1a	p.Ala1522Ser	MODERATE	missense_variant	4	133412629	C	A	number / total: 18 / 20	6.24451e-23	0	199	996136724948883	107283003628254	194	6.27914e-23	0	198	0	141059	0	191	386331416666508	0	3.23221e-20	ENSMUSG00000007880	ENSMUST00000145664	ENSMUSP00000122354.3	4:g.133412629C>A	c.4564G>T
17	Arid1a	p.Arg1287Lys	MODERATE	missense_variant	4	133413957	C	T	number / total: 15 / 20	0.000178896	0	190	0.000171278	0	198	996038377285004	55104698985815	194	0	5.21279e+07	0	201	39615947753191	1.68217e+07	0.0881253	ENSMUSG00000007880	ENSMUST00000145664	ENSMUSP00000122354.3	4:g.133413957C>T	c.3860G>A
25	Arid1a	p.Asp1508Asn	MODERATE	missense_variant	4	133412671	C	T	number / total: 18 / 20	1.69083e-12	0	194	1.73341e-12	0	190	995999574661255	10717000067234	199	0	1.56401e+08	0	192	400027725845575	0	8.53297e-10	ENSMUSG00000007880	ENSMUST00000145664	ENSMUSP00000122354.3	4:g.133412671C>T	c.4522G>A
16	Arid1a	p.Gln1339del	MODERATE	inframe_deletion	4	133413741	TTGCTGCTGCTGCTGCGGGGGGTA	TTGCTGCTGCTGCGGGGGGTA	number / total: 16 / 20	0.000468059	205469001084566	199	167217612266541	107127003371716	200	3.5302e-06	77989399433136	192	0	157619558740407	0	192	831206440925598	9.32911e+07	9.82652e-06	ENSMUSG00000007880	ENSMUST00000145664	ENSMUSP00000122354.3	4:g.133413754_133413756del	c.3990_3992del
13	Arid1a	p.Glu1719Lys	MODERATE	missense_variant	4	133409351	C	T	number / total: 20 / 20	995296478271484	45337799936533	185	40.7849	0	191	40.3088	0	192	0	2.72183e+07	0	193	401319330558181	690335175022483	20132.6	ENSMUSG00000007880	ENSMUST00000145664	ENSMUSP00000122354.3	4:g.133409351C>T	c.5155G>A
13	Arid1a	p.Gly1241Arg	MODERATE	missense_variant	4	133414096	C	T	number / total: 15 / 20	996237874031067	670956000685692	204	6.74217e-11	0	201	6.54186e-11	0	208	0	2.96579e+08	0	190	376183702610433	2.42952e+09	3.52127e-08	ENSMUSG00000007880	ENSMUST00000145664	ENSMUSP00000122354.3	4:g.133414096C>T	c.3721G>A
24	Arid1a	p.Gly1525Cys	MODERATE	missense_variant	4	133412618	GCCCTG	GCACTG	number / total: 18 / 20	996081352233887	107147999107838	200	2.22844e-18	0	193	2.16272e-18	0	199	0	1.3857e+09	0	190	391850154846907	0	1.11738e-15	ENSMUSG00000007880	ENSMUST00000145664	ENSMUSP00000122354.3	4:g.133412620delinsA	c.4573delinsT
24	Arid1a	p.Gly1898Asp	MODERATE	missense_variant	4	133408806	CGGGGGGCCCT	CGGGGGGTCCT	number / total: 20 / 20	1.77296e-10	0	201	1.83358e-10	0	194	996119558811188	10717000067234	199	0	1.38264e+09	0	188	388025213032961	1.42331e+08	9.26829e-08	ENSMUSG00000007880	ENSMUST00000145664	ENSMUSP00000122354.3	4:g.133408813delinsT	c.5693delinsA
24	Arid1a	p.His1529Leu	MODERATE	missense_variant	4	133412607	T	A	number / total: 18 / 20	2.23203e-11	0	200	996149599552155	107353001832962	191	2.24078e-11	0	199	0	1.34577e+09	0	186	385025981813669	0	1.15851e-08	ENSMUSG00000007880	ENSMUST00000145664	ENSMUSP00000122354.3	4:g.133412607T>A	c.4586A>T
24	Arid1a	p.Leu2197Phe	MODERATE	missense_variant	4	133407917	GG	AA	number / total: 20 / 20	996053814888	672349035739899	197	7.46621e-05	0	193	7.30633e-05	0	196	0	3.84361e+08	0	194	394611759111285	0	0.037325	ENSMUSG00000007880	ENSMUST00000145664	ENSMUSP00000122354.3	4:g.133407917_133407918delinsAA	c.6588_6589delinsTT
13	Arid1a	p.Lys1070Arg	MODERATE	missense_variant	4	133416565	T	C	number / total: 12 / 20	619076013565063	549843013286591	199	0.113632	0	190	0.000368044	0	194	0	5.93909e+09	0	187	380922824144363	8.08463e+06	0.185652	ENSMUSG00000007880	ENSMUST00000145664	ENSMUSP00000122354.3	4:g.133416565T>C	c.3209A>G
24	Arid1a	p.Met1300Ile	MODERATE	missense_variant	4	133413834	C	A	number / total: 16 / 20	1.84204e-05	0	193	996076226234436	650316998362541	197	1.80718e-05	0	198	0	1.52577e+08	0	195	392373837530613	0	0.000927471	ENSMUSG00000007880	ENSMUST00000145664	ENSMUSP00000122354.3	4:g.133413834C>A	c.3900G>T
24	Arid1a	p.Met1502Val	MODERATE	missense_variant	4	133412677	GCCCCTGCCACAT	GCCCCTGCCACAC	number / total: 18 / 20	996082127094269	107147999107838	200	6.63435e-20	0	191	6.32996e-20	0	201	0	46849	0	190	391778023913503	7.4015e+07	3.29913e-17	ENSMUSG00000007880	ENSMUST00000145664	ENSMUSP00000122354.3	4:g.133412689delinsC	c.4504delinsG
24	Arid1a	p.Pro1259Leu	MODERATE	missense_variant	4	133414041	G	A	number / total: 15 / 20	996056854724884	650316998362541	197	9.56975e-10	0	189	8.97016e-10	0	202	0	1.24658e+09	0	192	394302885979414	1.38679e+07	4.68814e-08	ENSMUSG00000007880	ENSMUST00000145664	ENSMUSP00000122354.3	4:g.133414041G>A	c.3776C>T
13	Arid1a	p.Pro1259Ser	MODERATE	missense_variant	4	133414042	G	A	number / total: 15 / 20	996140837669373	107022002339363	206	0	0	200	0	0	202	0	291944	0	192	385913578793406	3.69657e-05	1.26117e-28	ENSMUSG00000007880	ENSMUST00000145664	ENSMUSP00000122354.3	4:g.133414042G>A	c.3775C>T
24	Arid1a	p.Trp1503Ter	HIGH	stop_gained	4	133412677	GCCCCTGCCACAT	GCCCCTGCTACAT	number / total: 18 / 20	995907127857208	231523007154465	200	0	0	191	0	0	201	0	1.53123e+09	0	190	409270077943802	4.9238	0	ENSMUSG00000007880	ENSMUST00000145664	ENSMUSP00000122354.3	4:g.133412685delinsT	c.4508delinsA
24	Cdkn2a	p.Ala127Asp	MODERATE	missense_variant	4	89195033	G	T	number / total: 2 / 3	996251344680786	231415003538132	206	0	0	204	0	0	208	0	1.47218e+09	0	192	37484357599169	0	0	ENSMUSG00000044303	ENSMUST00000107131	ENSMUSP00000102748.3	4:g.89195033G>T	c.380C>A
13	Cdkn2a	p.Arg97Ter	HIGH	stop_gained	4	89195124	G	A	number / total: 2 / 3	996357798576355	648922026157379	203	3.07043e-10	0	211	3.03809e-10	0	213	0	1.88217e+08	0	191	364216812886298	0	1.67225e-07	ENSMUSG00000044303	ENSMUST00000107131	ENSMUSP00000102748.3	4:g.89195124G>A	c.289C>T
24	Cdkn2a	p.Gly87Val	MODERATE	missense_variant	4	89195153	C	A	number / total: 2 / 3	996319591999054	23139800131321	207	0	0	209	0	0	210	0	1.45378e+09	0	193	368027272634208	0	0	ENSMUSG00000044303	ENSMUST00000107131	ENSMUSP00000102748.3	4:g.89195153C>A	c.260G>T
13	Cdkn2a	p.Gly95Asp	MODERATE	missense_variant	4	89195129	C	T	number / total: 2 / 3	996358215808868	107063002884388	204	9.4493e-16	0	212	9.32608e-17	0	214	0	1.20404e+09	0	191	363270449452102	899290807865327	5.15348e-13	ENSMUSG00000044303	ENSMUST00000107131	ENSMUSP00000102748.3	4:g.89195129C>T	c.284G>A
24	Cdkn2a	p.Phe143Ser	MODERATE	missense_variant	4	89194985	A	G	number / total: 2 / 3	0.00019575	0	199	0.000200585	0	192	996003329753876	545968003571033	217	0	4.14038e+08	0	191	399659294635057	2.91609e+07	0.0988782	ENSMUSG00000044303	ENSMUST00000107131	ENSMUSP00000102748.3	4:g.89194985A>G	c.428T>C
17	Cdkn2a	p.Ser116Pro	MODERATE	missense_variant	4	89195067	A	G	number / total: 2 / 3	8.97842e-05	0	199	0.0265277	0	1	635076463222504	107329003512859	191	0	990672469924903	0	193	364914417266846	0	0.464088	ENSMUSG00000044303	ENSMUST00000107131	ENSMUSP00000102748.3	4:g.89195067A>G	c.346T>C
13	Ctnnb1	p.Ala21Val	MODERATE	missense_variant	9	120779636	C	T	number / total: 3 / 15	996021926403046	107236996293068	196	9.94922e-29	0	196	1.00893e-27	0	191	0	129748	0	191	397804798558354	0	5.01539e-25	ENSMUSG00000006932	ENSMUST00000007130	ENSMUSP00000007130.9	9:g.120779636C>T	c.62C>T
24	Egfr	p.Ala700Val	MODERATE	missense_variant	11	16841209	C	T	number / total: 18 / 28	1.48355e-18	0	199	996136665344238	107147999107838	200	1.49279e-18	0	198	0	1.27192e+09	0	193	386322429403663	44371.1	7.68247e-16	ENSMUSG00000020122	ENSMUST00000020329	ENSMUSP00000020329.7	11:g.16841209C>T	c.2099C>T
24	Egfr	p.Gly798Asp	MODERATE	missense_variant	11	16846997	G	A	number / total: 20 / 28	0.001228	0	197	996161460876465	107147999107838	199	0.00119784	0	203	0	1.33832e+09	0	194	383839732967317	0	0.630231	ENSMUSG00000020122	ENSMUST00000020329	ENSMUSP00000020329.7	11:g.16846997G>A	c.2393G>A
24	Egfr	p.Gly87Cys	MODERATE	missense_variant	11	16810086	G	T	number / total: 3 / 28	3.1989e-05	0	183	996041893959045	650800988078117	195	2.87872e-05	0	206	0	1.76283e+08	0	192	395803852006793	3.54038e+07	0.0153109	ENSMUSG00000020122	ENSMUST00000020329	ENSMUSP00000020329.7	11:g.16810086G>T	c.259G>T
24	Egfr	p.Ile717Val	MODERATE	missense_variant	11	16841252	CAAAAAGAT	CAAAAAGGT	number / total: 18 / 28	996118783950806	11710599809885	202	0	0	200	0	0	197	0	259299	0	190	388123537413776	0	0	ENSMUSG00000020122	ENSMUST00000020329	ENSMUSP00000020329.7	11:g.16841259delinsG	c.2149delinsG
24	Egfr	p.Lys716Arg	MODERATE	missense_variant	11	16841252	CAAAAAGAT	CAAAAGGAT	number / total: 18 / 28	1.3471e-05	0	202	2.9282e-06	0	200	99394565820694	107213996350765	197	0	2.20415e+09	0	190	6047697737813	64437699620612	0.000703559	ENSMUSG00000020122	ENSMUST00000020329	ENSMUSP00000020329.7	11:g.16841257delinsG	c.2147delinsG
24	Egfr	p.Pro693Leu	MODERATE	missense_variant	11	16841188	C	T	number / total: 18 / 28	996114253997803	649842992424965	199	3.1776e-11	0	201	3.155e-11	0	198	0	2.50098e+08	0	192	388570572249591	5766.34	1.6248e-10	ENSMUSG00000020122	ENSMUST00000020329	ENSMUSP00000020329.7	11:g.16841188C>T	c.2078C>T
24	Egfr	p.Ser786_Thr787delinsPheAla	MODERATE	missense_variant	11	16846961	CCA	TCG	number / total: 20 / 28	0	0	199	996179282665253	107192002236843	198	0	0	203	0	1153.45	0	196	382067379541695	0	0	ENSMUSG00000020122	ENSMUST00000020329	ENSMUSP00000020329.7	11:g.16846961_16846963delinsTCG	c.2357_2359delinsTCG
24	Egfr	p.Trp733Arg	MODERATE	missense_variant	11	16843014	T	C	number / total: 19 / 28	9.01987e-05	0	193	996104598045349	107260003685951	194	8.40039e-05	0	205	0	5.15537e+09	0	192	389484292827547	0.0001	0.0445964	ENSMUSG00000020122	ENSMUST00000020329	ENSMUSP00000020329.7	11:g.16843014T>C	c.2197T>C
24	Fbxw7	p.Glu572Gly	MODERATE	missense_variant	3	84883542	A	G	number / total: 13 / 14	4.15625e-12	0	201	996143877506256	107127003371716	201	4.24718e-11	0	197	0	1.29614e+09	0	192	385602703318	0	2.1732e-08	ENSMUSG00000028086	ENSMUST00000107679	ENSMUSP00000103306.2	3:g.84883542A>G	c.1715A>G
24	Fbxw7	p.His583Arg	MODERATE	missense_variant	3	84883575	A	G	number / total: 13 / 14	98777973651886	137084007263184	201	4.43201e-14	0	201	2.37685e-13	0	196	0	2.09426e+07	0	191	122202476486564	290.469	2.28296e-11	ENSMUSG00000028086	ENSMUST00000107679	ENSMUSP00000103306.2	3:g.84883575A>G	c.1748A>G
25	Fbxw7	p.Lys593Glu	MODERATE	missense_variant	3	84883604	A	G	number / total: 13 / 14	2.89467	0	200	3.08035	0	190	995750546455383	450800992548466	195	0	2.33034e+07	0	193	397401954978704	275410158792511	1498.65	ENSMUSG00000028086	ENSMUST00000107679	ENSMUSP00000103306.2	3:g.84883604A>G	c.1777A>G
24	Fgfr2	p.Ala279Val	MODERATE	missense_variant	7	129802873	G	A	number / total: 7 / 18	0	0	204	996176302433014	127169996500015	199	0	0	198	0	1.6694e+06	0	192	382366683334112	0	1.14906e-27	ENSMUSG00000030849	ENSMUST00000122054	ENSMUSP00000112430.2	7:g.129802873G>A	c.836C>T
13	Fgfr2	p.Ile310Thr	MODERATE	missense_variant	7	129802780	A	G	number / total: 7 / 18	817956268787384	673077031970024	194	0.469785	0	194	0.00442079	0	186	0	154141650909878	0	195	182042166590691	1.03379e+07	2.13501	ENSMUSG00000030849	ENSMUST00000122054	ENSMUSP00000112430.2	7:g.129802780A>G	c.929T>C
24	Fgfr2	p.Ser286Pro	MODERATE	missense_variant	7	129802853	A	G	number / total: 7 / 18	2.43949e-14	0	207	6.84542e-13	0	198	948446869850159	117169998586178	198	0	28242959160707	0	191	515252389013767	159.698	1.30737e-11	ENSMUSG00000030849	ENSMUST00000122054	ENSMUSP00000112430.2	7:g.129802853A>G	c.856T>C
24	Idh2	p.Gly176Asp	MODERATE	missense_variant	7	79748753	C	T	number / total: 4 / 11	3.88509e-18	0	215	4.18023e-17	0	199	996272265911102	107127003371716	201	0	1.12813e+09	0	191	37276060320437	0	2.15774e-14	ENSMUSG00000030541	ENSMUST00000107384	ENSMUSP00000103007.4	7:g.79748753C>T	c.527G>A
24	Nras	p.Asp107Tyr	MODERATE	missense_variant	3	102969718	G	T	number / total: 4 / 7	1.67764e-05	0	195	996127247810364	674083977937698	191	0.000158854	0	207	0	2.98566e+08	0	191	382657325826585	462061652797274	0.0851139	ENSMUSG00000027852	ENSMUST00000029445	ENSMUSP00000029445.7	3:g.102969718G>T	c.319G>T
24	Nras	p.Asp119Gly	MODERATE	missense_variant	3	102969755	A	G	number / total: 4 / 7	3.05562e-05	0	195	970354020595551	107353001832962	190	2.89134e-05	0	207	0	1.3155e+09	0	193	372777809388936	259179100394249	0.0154953	ENSMUSG00000027852	ENSMUST00000029445	ENSMUSP00000029445.7	3:g.102969755A>G	c.356A>G
24	Nras	p.Gln43Ter	HIGH	stop_gained	3	102967532	C	T	number / total: 3 / 7	0	0	200	0	0	192	996067643165588	23123300075531	217	0	5.37638e+09	0	197	393178733065724	5.26018e-10	0	ENSMUSG00000027852	ENSMUST00000029445	ENSMUSP00000029445.7	3:g.102967532C>T	c.127C>T
17	Nras	p.Leu23Glu	MODERATE	missense_variant	3	102966304	CT	GA	number / total: 2 / 7	0	0	193	840539634227753	116942003369331	210	0	0	215	0	1.32108e+07	0	199	159460440278053	0	0	ENSMUSG00000027852	ENSMUST00000029445	ENSMUSP00000029445.7	3:g.102966304_102966305delinsGA	c.67_68delinsGA
24	Nras	p.Met72Val	MODERATE	missense_variant	3	102967619	A	G	number / total: 3 / 7	996224343776703	231542006134987	199	0	0	195	0	0	215	0	1.4476e+09	0	199	377554818987846	0	0	ENSMUSG00000027852	ENSMUST00000029445	ENSMUSP00000029445.7	3:g.102967619A>G	c.214A>G
24	Nras	p.Val114Ala	MODERATE	missense_variant	3	102969740	T	C	number / total: 4 / 7	0.000779471	0	195	996162295341492	451800003647804	191	0.074131	0	206	0	2.80634e+07	0	191	383751420304179	1.34617e+09	39.5185	ENSMUSG00000027852	ENSMUST00000029445	ENSMUSP00000029445.7	3:g.102969740T>C	c.341T>C
24	Pik3ca	p.Ala314Asp	MODERATE	missense_variant	3	32493979	GCCACAC	GACACAC	number / total: 4 / 20	0.00170099	0	216	996176064014435	550801008939743	195	0.00183063	0	194	0	1.24171e+08	0	183	382393063046038	0.121423	0.920873	ENSMUSG00000027665	ENSMUST00000029201	ENSMUSP00000029201.8	3:g.32493980delinsA	c.941delinsA
24	Pik3ca	p.Arg398Cys	MODERATE	missense_variant	3	32496921	C	T	number / total: 6 / 20	996057033538818	117192000150681	197	7.54572e-20	0	190	7.19617e-20	0	200	0	521434	0	198	394293898716569	0	3.72734e-17	ENSMUSG00000027665	ENSMUST00000029201	ENSMUSP00000029201.8	3:g.32496921C>T	c.1192C>T
24	Pik3ca	p.Asp717Asn	MODERATE	missense_variant	3	32506038	G	A	number / total: 13 / 20	1.006e-19	0	206	996163189411163	107353001832962	191	1.06023e-19	0	195	0	202815	0	196	383680802769959	5.24809e-20	5.3703e-17	ENSMUSG00000027665	ENSMUST00000029201	ENSMUSP00000029201.8	3:g.32506038G>A	c.2149G>A
24	Pik3ca	p.Glu722Val	MODERATE	missense_variant	3	32506054	A	T	number / total: 13 / 20	1.04857e-21	0	205	1.12099e-22	0	191	996117413043976	107306003570557	193	0	209122	0	197	388257554732263	0	5.57185e-19	ENSMUSG00000027665	ENSMUST00000029201	ENSMUSP00000029201.8	3:g.32506054A>T	c.2165A>T
24	Pik3ca	p.His917Tyr	MODERATE	missense_variant	3	32515711	C	T	number / total: 18 / 20	2.98744e-19	0	215	3.41508e-19	0	189	996151149272919	106941998004913	210	0	75700.7	0	190	384866376407444	1.71064e+09	1.65882e-17	ENSMUSG00000027665	ENSMUST00000029201	ENSMUSP00000029201.8	3:g.32515711C>T	c.2749C>T
24	Pik3ca	p.Lys416Thr	MODERATE	missense_variant	3	32496976	A	C	number / total: 6 / 20	55885.6	0	199	58103.2	0	190	995845973491669	449842996895313	199	0	1.25939e+09	0	197	395339308306575	200470283743925	2.87442e+06	ENSMUSG00000027665	ENSMUST00000029201	ENSMUSP00000029201.8	3:g.32496976A>C	c.1247A>C
13	Pik3ca	p.Lys528Glu	MODERATE	missense_variant	3	32502146	A	G	number / total: 9 / 20	995876550674438	450557991862297	196	11053.5	0	194	11531.9	0	189	0	1.29202e+09	0	193	403766240924597	857017876114696	5.5761e+06	ENSMUSG00000027665	ENSMUST00000029201	ENSMUSP00000029201.8	3:g.32502146A>G	c.1582A>G
25	Pik3ca	p.Ser514Asn	MODERATE	missense_variant&splice_region_variant	3	32502105	G	A	number / total: 9 / 20	9.74092e-06	0	191	9.2811e-05	0	203	996050953865051	550079010426998	198	0	7.97095e+07	0	193	391462445259094	343771716870833	0.0484507	ENSMUSG00000027665	ENSMUST00000029201	ENSMUSP00000029201.8	3:g.32502105G>A	c.1541G>A
13	Pik3ca	p.Ser919Asn	MODERATE	missense_variant	3	32515718	G	A	number / total: 18 / 20	965675890445709	449842996895313	198	551823	0	202	518323	0	216	0	1.06738e+09	0	189	357981096021831	307439714670181	2.88942e+08	ENSMUSG00000027665	ENSMUST00000029201	ENSMUSP00000029201.8	3:g.32515718G>A	c.2756G>A
13	Pik3ca	p.Thr1061Ala	MODERATE	missense_variant	3	32516954	A	G	number / total: 20 / 20	969497263431549	551545992493629	192	0.0730633	0	202	1.12876	0	204	0	7.5544e+08	0	194	305028203874826	0.0370424	3.82649	ENSMUSG00000027665	ENSMUST00000029201	ENSMUSP00000029201.8	3:g.32516954A>G	c.3181A>G
16	Pik3ca	p.Trp383Ter	HIGH	stop_gained	3	32496878	G	A	number / total: 6 / 20	2.11105e-11	0	189	2.08066e-11	0	192	995978951454163	646366029977798	215	0	1.31887e+08	0	197	402105459943414	0	1.03944e-08	ENSMUSG00000027665	ENSMUST00000029201	ENSMUSP00000029201.8	3:g.32496878G>A	c.1149G>A
24	Pten	p.Asp268Asn	MODERATE	missense_variant&splice_region_variant	19	32795236	G	A	number / total: 8 / 9	38752.6	0	214	995009541511536	449378006160259	200	42150.2	0	196	0	1.10596e+09	0	193	37572483997792	123304792214185	2.14432e+07	ENSMUSG00000013663	ENSMUST00000013807	ENSMUSP00000013807.8	19:g.32795236G>A	c.802G>A
24	Pten	p.Gln171Ter	HIGH	stop_gained	19	32789114	C	T	number / total: 6 / 9	6.34454e-09	0	212	996382474899292	107329003512859	192	6.28203e-09	0	216	0	1.31172e+09	0	196	361742847599089	0	3.48097e-06	ENSMUSG00000013663	ENSMUST00000013807	ENSMUSP00000013807.8	19:g.32789114C>T	c.511C>T
24	Pten	p.Lys263Arg	MODERATE	missense_variant	19	32792970	A	G	number / total: 7 / 9	0.0846251	0	191	0.0873776	0	199	995893478393555	107500001788139	184	0	1.52321e+09	0	196	410638796165586	1.94496e+08	41.7542	ENSMUSG00000013663	ENSMUST00000013807	ENSMUSP00000013807.8	19:g.32792970A>G	c.788A>G
24	Rnf43	p.Arg454Cys	MODERATE	missense_variant	11	87622260	C	T	number / total: 9 / 10	0.00906151	0	193	0.00875186	0	200	996095299720764	550079010426998	198	0	7.91316e+07	0	199	390463112853467	0	4.54883	ENSMUSG00000034177	ENSMUST00000165679	ENSMUSP00000130685.2	11:g.87622260C>T	c.1360C>T
13	Rnf43	p.Asp593Asn	MODERATE	missense_variant	11	87622677	G	A	number / total: 9 / 10	953879237174988	548698008060455	204	0.00025363	0	201	1.03181e-05	0	204	0	1.24171e+08	0	192	461211353540421	1.32868e+07	0.0054689	ENSMUSG00000034177	ENSMUST00000165679	ENSMUSP00000130685.2	11:g.87622677G>A	c.1777G>A
24	Rnf43	p.Cys252Tyr	MODERATE	missense_variant	11	87620293	G	A	number / total: 7 / 10	0.0245754	0	190	990016877651215	549843013286591	199	0.00968054	0	192	0	3.3759e+08	0	195	987120252102613	111853601993062	12.1927	ENSMUSG00000034177	ENSMUST00000165679	ENSMUSP00000130685.2	11:g.87620293G>A	c.755G>A
14	Rnf43	p.Cys91Arg	MODERATE	missense_variant	11	87609222	T	C	number / total: 3 / 10	0	0	210	915469527244568	231781005859375	186	0	0	196	0	213049315789249	0	194	831036418676376	142400036565959	0	ENSMUSG00000034177	ENSMUST00000165679	ENSMUSP00000130685.2	11:g.87609222T>C	c.271T>C
24	Rnf43	p.Glu442Asp	MODERATE	missense_variant	11	87622226	G	T	number / total: 9 / 10	2.52638e-05	0	204	2.66379e-05	0	193	996128618717194	66922202706337	212	0	3.46737e+08	0	202	387132749892771	0	0.0133659	ENSMUSG00000034177	ENSMUST00000165679	ENSMUSP00000130685.2	11:g.87622226G>T	c.1326G>T
24	Rnf43	p.Gly102Glu	MODERATE	missense_variant	11	87609256	G	A	number / total: 3 / 10	6.59327e-17	0	209	99630731344223	107213996350765	197	6.61913e-17	0	211	0	1.20973e+09	0	194	369249633513391	0	3.56861e-14	ENSMUSG00000034177	ENSMUST00000165679	ENSMUSP00000130685.2	11:g.87609256G>A	c.305G>A
24	Rnf43	p.Gly570Asp	MODERATE	missense_variant	11	87622609	G	A	number / total: 9 / 10	2.06776e-14	0	197	99618011713028	107306003570557	192	1.93419e-14	0	209	0	1.09446e+09	0	191	381979462690651	9009.48	1.04472e-11	ENSMUSG00000034177	ENSMUST00000165679	ENSMUSP00000130685.2	11:g.87622609G>A	c.1709G>A
17	Rnf43	p.His584Arg	MODERATE	missense_variant	11	87622651	A	G	number / total: 9 / 10	988272547721863	106903001666069	212	8.56644e-22	0	39	1.56242e-22	0	211	0	66328.5	0	189	117273516952991	6.17533e+06	8.5487e-20	ENSMUSG00000034177	ENSMUST00000165679	ENSMUSP00000130685.2	11:g.87622651A>G	c.1751A>G
24	Rnf43	p.Lys125Arg	MODERATE	missense_variant&splice_region_variant	11	87609325	A	G	number / total: 3 / 10	1.71435e-08	0	193	1.64097e-08	0	199	99605393409729	107500001788139	185	0	1.28207e+09	0	193	39459359832108	2.32012e+07	8.47814e-07	ENSMUSG00000034177	ENSMUST00000165679	ENSMUSP00000130685.2	11:g.87609325A>G	c.374A>G
24	Rnf43	p.Met1?	HIGH	start_lost	11	87555443	T	C	number / total: 2 / 10	99608039855957	551799982786179	191	0.041505	0	199	0.0415241	0	200	0	5.95361e+07	0	201	391958421096206	2.5182e+08	21.1203	ENSMUSG00000034177	ENSMUST00000165679	ENSMUSP00000130685.2	11:g.87555443T>C	c.2T>C
13	Rnf43	p.Pro569Ser	MODERATE	missense_variant	11	87622605	C	T	number / total: 9 / 10	99622106552124	107063002884388	203	9.26618e-07	0	203	9.20663e-06	0	204	0	1.36968e+09	0	191	377876637503505	0	0.00487529	ENSMUSG00000034177	ENSMUST00000165679	ENSMUSP00000130685.2	11:g.87622605C>T	c.1705C>T
13	Rnf43	p.Pro694Leu	MODERATE	missense_variant	11	87622981	C	T	number / total: 9 / 10	99624240398407	549377985298634	201	6.73442e-08	0	216	7.26609e-08	0	199	0	1.25216e+08	0	193	37575950846076	0	3.71535e-05	ENSMUSG00000034177	ENSMUST00000165679	ENSMUSP00000130685.2	11:g.87622981C>T	c.2081C>T
24	Rnf43	p.Ser630Asn	MODERATE	missense_variant	11	87622789	G	A	number / total: 9 / 10	4.88201e-17	0	207	976707458496094	107213996350765	197	5.74778e-16	0	212	0	6.87939e+09	0	194	232916418462992	1.54099e-16	2.61939e-15	ENSMUSG00000034177	ENSMUST00000165679	ENSMUSP00000130685.2	11:g.87622789G>A	c.1889G>A
24	Smad4	p.Gln168Ter	HIGH	stop_gained	18	73795891	G	A	number / total: 5 / 12	995967924594879	117260001599789	194	3.9012e-19	0	192	4.00036e-18	0	189	0	617731	0	197	403208797797561	2.5897e+07	1.95389e-15	ENSMUSG00000024515	ENSMUST00000025393	ENSMUSP00000025393.8	18:g.73795891G>A	c.502C>T
24	Smad4	p.His281Arg	MODERATE	missense_variant	18	73791698	T	C	number / total: 7 / 12	0.307964	0	199	0.317907	0	193	996086835861206	750558003783226	196	0	5.12342e+07	0	191	3912010230124	109272309600783	159.514	ENSMUSG00000024515	ENSMUST00000025393	ENSMUSP00000025393.8	18:g.73791698T>C	c.842A>G
24	Smad4	p.Leu500Ile	MODERATE	missense_variant	18	73773487	G	T	number / total: 12 / 12	996091663837433	23139800131321	206	0	0	189	0	0	204	0	1.29051e+09	0	191	390822859480977	0	0	ENSMUSG00000024515	ENSMUST00000025393	ENSMUSP00000025393.8	18:g.73773487G>T	c.1498C>A
24	Smad4	p.Leu532Pro	MODERATE	missense_variant	18	73773390	A	G	number / total: 12 / 12	7.14662e-28	0	214	345762610435486	137425005435944	188	7.41651e-25	203348994255066	208	0	13279750419315	0	191	654236853122711	6.05759e-06	3.93092e-25	ENSMUSG00000024515	ENSMUST00000025393	ENSMUSP00000025393.8	18:g.73773390A>G	c.1595T>C
24	Smad4	p.Pro169Leu	MODERATE	missense_variant	18	73795887	G	A	number / total: 5 / 12	937713980674744	107260003685951	194	0.00140702	0	192	0.00598688	0	188	0	281695480225608	0	198	620040409266949	1.01223e+07	0.112954	ENSMUSG00000024515	ENSMUST00000025393	ENSMUSP00000025393.8	18:g.73795887G>A	c.506C>T
24	Smad4	p.Pro317Leu	MODERATE	missense_variant&splice_region_variant	18	73790267	AGGAT	AAGAT	number / total: 8 / 12	343.162	0	188	981569290161133	651047006249428	193	33.4349	0	193	0	2.58273e+08	0	186	396250654011965	144680477678776	167996	ENSMUSG00000024515	ENSMUST00000025393	ENSMUSP00000025393.8	18:g.73790268delinsA	c.950delinsT
13	Smad4	p.Pro479Ser	MODERATE	missense_variant	18	73774863	G	A	number / total: 11 / 12	996165215969086	648922026157379	203	6.84699e-09	0	200	6.81397e-09	0	201	0	1.99021e+08	0	183	383477634750307	0	3.55223e-06	ENSMUSG00000024515	ENSMUST00000025393	ENSMUSP00000025393.8	18:g.73774863G>A	c.1435C>T
24	Smad4	p.Thr276Ala	MODERATE	missense_variant	18	73791714	T	C	number / total: 7 / 12	2.79576e-06	0	199	872546136379242	107283003628254	194	0.000207778	0	196	0	374463957086846	0	194	127450048923492	123220	0.00144411	ENSMUSG00000024515	ENSMUST00000025393	ENSMUSP00000025393.8	18:g.73791714T>C	c.826A>G
13	Stk11	p.Ala43Thr	MODERATE	missense_variant	10	79952578	G	A	number / total: 1 / 10	996173977851868	107042998075485	204	1.17031e-06	0	201	1.14367e-06	0	204	0	1.38455e+09	0	195	382586731575429	1.11419e+07	0.000603115	ENSMUSG00000003068	ENSMUST00000003152	ENSMUSP00000003152.8	10:g.79952578G>A	c.127G>A
9	Stk11	p.Cys210Tyr	MODERATE	missense_variant	10	79962098	G	A	number / total: 5 / 10	944401144981384	107127003371716	199	344.508	0	204	12.1395	0	194	0	203896661332692	0	188	551036074757576	493026163894683	6124.92	ENSMUSG00000003068	ENSMUST00000003152	ENSMUSP00000003152.8	10:g.79962098G>A	c.629G>A
13	Stk11	p.Lys235Arg	MODERATE	missense_variant	10	79962173	A	G	number / total: 5 / 10	996098935604095	549148991703987	202	0.0125719	0	206	0.0136144	0	200	0	6.57507e+07	0	195	388329173438251	177566034835763	6.72357	ENSMUSG00000003068	ENSMUST00000003152	ENSMUSP00000003152.8	10:g.79962173A>G	c.704A>G
24	Stk11	p.Trp239Ter	HIGH	stop_gained	10	79962185	G	A	number / total: 5 / 10	3.12176e-22	0	216	3.32048e-22	0	201	996284008026123	23139800131321	206	0	6.54682e+09	0	194	371227343566716	300780811812729	1.73061e-19	ENSMUSG00000003068	ENSMUST00000003152	ENSMUSP00000003152.8	10:g.79962185G>A	c.716G>A
24	Trp53	p.Ala361Ser	MODERATE	missense_variant	11	69481578	G	T	number / total: 10 / 11	0.00518204	0	192	99607789516449	107377000153065	187	0.000499573	0	200	0	1.20484e+08	0	186	39220224134624	0	2.58762	ENSMUSG00000059552	ENSMUST00000108658	ENSMUSP00000104298.4	11:g.69481578G>T	c.1081G>T
13	Trp53	p.Arg206Gly	MODERATE	missense_variant	11	69479517	A	G	number / total: 6 / 11	996314465999603	107306003570557	190	41.1718	0	210	41.2668	0	209	0	1.99742e+08	0	194	368536124005914	35.8179	22310	ENSMUSG00000059552	ENSMUST00000108658	ENSMUSP00000104298.4	11:g.69479517A>G	c.616A>G
24	Trp53	p.Arg360Gly	MODERATE	missense_variant	11	69481575	A	G	number / total: 10 / 11	995821237564087	107283003628254	193	0.00387168	0	187	0.00377399	0	200	0	1.62345e+09	0	184	416831020265818	103316588138114	1.82852	ENSMUSG00000059552	ENSMUST00000108658	ENSMUSP00000104298.4	11:g.69481575A>G	c.1078A>G
25	Trp53	p.Asp358Gly	MODERATE	missense_variant	11	69481570	A	G	number / total: 10 / 11	14.9555	0	192	14.8389	0	194	996033072471619	10742499679327	185	0	1.36562e+09	0	185	396670633926988	0	7488.59	ENSMUSG00000059552	ENSMUST00000108658	ENSMUSP00000104298.4	11:g.69481570A>G	c.1073A>G
24	Trp53	p.Glu268Ter	HIGH	stop_gained	11	69480427	G	T	number / total: 8 / 11	996119260787964	231523007154465	197	5.99517e-23	0	197	5.88167e-23	0	200	0	1.38385e+09	0	189	38806099910289	0	3.05141e-20	ENSMUSG00000059552	ENSMUST00000108658	ENSMUSP00000104298.4	11:g.69480427G>T	c.802G>T
13	Trp53	p.Glu5Asp	MODERATE	missense_variant	11	69477731	G	T	number / total: 2 / 11	996137320995331	116981998085976	208	0	0	197	0	0	200	0	597173	0	189	386269157752395	0	0	ENSMUSG00000059552	ENSMUST00000108658	ENSMUSP00000104298.4	11:g.69477731G>T	c.15G>T
24	Trp53	p.Ser312Pro	MODERATE	missense_variant	11	69480635	GCCTCTCCCCCGCA	GCCCCTCCCCCGCA	number / total: 9 / 11	3.16447e-08	0	197	994246125221252	107213996350765	196	6.11223e-08	0	186	0	2.30245e+09	0	197	575360376387835	1.68616e-08	1.60509e-05	ENSMUSG00000059552	ENSMUST00000108658	ENSMUSP00000104298.4	11:g.69480638delinsC	c.934delinsC
24	Trp53	p.Ser7Pro	MODERATE	missense_variant	11	69477735	T	C	number / total: 2 / 11	1.02118e-06	0	193	991143584251404	117306001484394	191	3.51803e-08	0	200	0	2.53881e+09	0	189	885075051337481	541900953976437	0.000509096	ENSMUSG00000059552	ENSMUST00000108658	ENSMUSP00000104298.4	11:g.69477735T>C	c.19T>C
24	Trp53	p.Val170Met	MODERATE	missense_variant	11	69479331	G	A	number / total: 5 / 11	0.00122349	0	201	996129095554352	551545992493629	192	0.00125922	0	196	0	1.63407e+09	0	187	387070351280272	3.53867e+06	0.63944	ENSMUSG00000059552	ENSMUST00000108658	ENSMUSP00000104298.4	11:g.69479331G>A	c.508G>A
